# Supplementary material
Source: publisher figshare collection journal article supplement (https://gsajournals.figshare.com/ndownloader/files/20697324)
Supplement: Supplementary file 1 [file 20697324]

## Sheet: nos-Cas9
Glossary		A Progeny of F0 cross with Maternal Cas9
R = Cas 9: dsRed phenotype		♀w+/w+; nos-Cas9/+ X ♂w-,y-, 2x gRNA; +/+										Zygotic+Deposition		Deposition
G = gRNA: GFPphenotype	batch #1 (10♀ x 10 ♂)	Phenotype	R	RGywM	RGyw	RGw	GywM	Gyw	G	WT	total	cut@W	cut@Y	cut@W	cut@Y
w = white phenotype		♀		45	5		53				103	100	100	100	100
y = yellow phenotype		♂	39							38	77
M = mosaic for white phenotype	batch #2 (10♀ x 10 ♂)
♀ = female		♀		35			40	6			81	100	100	100	100
♂ = male		♂	44							48	92
collect and keep	batch #3 (10♀ x 10 ♂)
		♀		40			39	3			82	100	100	100	100
		♂	29							33	62
		B Progeny of F0 cross with Paternal Cas9
		♀w-,y-, 2x gRNA/w+, y+; +/+ X ♂w+,y+; nos-Cas9/+										Zygotic		Deposition
	batch #1 (10♀ x 10 ♂)	Phenotype	R	RGywM	RGyw	RGw	Gyw	Gw	G	WT	total	cut@W	cut@Y	cut@W	cut@Y
		♀	23	18					11	20	72	100	100	0	0
		♂	26		19		7	14		29	95
	batch #2 (10♀ x 10 ♂)
		♀	27	21	6				11	33	98	100	100	0	0
		♂	19		16		6	14		23	78
	batch #3 (10♀ x 10 ♂)
		♀	27	24					12	24	87	100	100	0	0
		♂	24		17		12	7		18	78
		A Progeny of F1 Trans-het ♀ with Maternal Cas9: ♀w-,y-, 2x gRNA(GFP)/+; Cas9(RFP)/+ [RGywM] X ♂ w+/w+ (Canton S)
	batch #1 (10♀ x 10 ♂)	Phenotype	R	Ry	RywM	Rw	Ryw	RGywM	RGyw	RGwM	RGw	RGy	RG	GywM	Gyw	Gw	Gy	G	WT	yW	Yw	yw	total	#w	#W	#G	#w(noG)	#y	Cut@W	HDR%	R1@W	W%	cut@Y	wCUT%	wHDR%	w[R2]%	W%	yCut%
		♀					1		16			3			15		1			2		2	40	38	6	35	3	40	90	75	15	15	100	91.2963	74.537	16.7593	9.35185	100
		♂		1			1		25						22					1		4	54	52	2	47	5	54	92.5926	74.0741	18.5185	3.7037	100
	batch #2 (10♀ x 10 ♂)
		♀		2			1		26		1	4		1	27		6		2	1		4	75	70	15	65	5	72	86.6667	73.3333	13.3333	20	92	83.9583	72.6042	11.3542	14.6875	91.3125
		♂		1			1		30						23	2			1	4		2	64	58	6	55	3	61	81.25	71.875	9.375	9.375	90.625
	batch #3 (10♀ x 10 ♂)
		♀		1			1	1	29		1	4	1		41	1	3					2	85	84	9	81	3	82	97.6471	90.5882	7.05882	10.5882	92.9412	97.7597	94.2303	3.52941	5.82603	94.3429
		♂							48						43	2				1			94	93	1	93	0	92	97.8723	97.8723	0	1.06383	95.7447
		A Progeny of F1 Trans-het ♀ with Paternal Cas9: ♀w-,y-, 2x gRNA(GFP)/+; Cas9(RFP)/+ [RGywM] X ♂ w+/w+ (Canton S)
	batch #1 (10♀ x 10 ♂)	Phenotype	R	Ry	RywM	Rw	Ryw	RGywM	RGyw	RGwM	RGw	RGy	RG	GywM	Gyw	Gw	Gy	G	WT	yW	Yw	yw	total	w#	W#	G#	w(noG)#	#y	Cut@W	HDR%	R1@W	W%	cut@Y	wCUT%	wHDR%	w[R2]%	W%	yCut%
		♀		3					48			5		1	43		1	1	1	3			106	99	14	99	0	104	86.7925	86.7925	0	13.2075	96.2264	84.9752	79.712	5.26316	10.8143	93.9027
		♂		2			1		48						30	4				6		4	95	87	8	82	5	91	83.1579	72.6316	10.5263	8.42105	91.5789
	batch #2 (10♀ x 10 ♂)
		♀		2			2		21			2			24	1	2	2				1	57	55	8	52	3	54	92.9825	82.4561	10.5263	14.0351	89.4737	92.7176	81.7941	10.9235	8.90434	94.7368
		♂		2			1		23						25							2	53	51	2	48	3	53	92.4528	81.1321	11.3208	3.77358	100
	batch #3 (10♀ x 10 ♂)
		♀		1			7		26	2		4			31	1	4	2				3	81	80	11	70	10	76	97.5309	72.8395	24.6914	13.5802	87.6543	96.4666	77.2244	19.2422	7.93955	93.8272
		♂		2			2		39						40							4	87	85	2	79	6	87	95.4023	81.6092	13.7931	2.29885	100
		A Progeny of F1 Hetero ♀ with Maternal Cas9: ♀w-,y-, 2x gRNA(GFP)/+; +/+ [GywM] X ♂ w-/w-
	batch #1 (10♀ x 10 ♂)	Phenotype	R	Ry	RywM	Rw	Ryw	RGywM	RGyw	RGwM	RGw	RGy	RG	GywM	Gyw	Gw	Gy	G	WT	yW	Yw	yw	total	w#	W#	G#	w(noG)#	#y	Cut@W	HDR%	R1@W	W%	cut@Y	wCUT%	wHDR%	w[R2]%	W%	yCut%
		♀														65					14		79	79	0	65	14	0	100	64.557	35.443	0	0	100	64.8872	35.1128	0	0
		♂													14	24					8		46	46	0	38	8	14	100	65.2174	34.7826	0	-39.1304
	batch #2 (10♀ x 10 ♂)
		♀														88			2		23		113	111	2	88	23	0	96.4602	55.7522	40.708	1.76991	0	92.9669	61.2094	31.7575	3.51653	0
		♂													34	61			6		9	4	114	108	6	95	13	38	89.4737	66.6667	22.807	5.26316	-33.3333
	batch #3 (10♀ x 10 ♂)
		♀														55				5			60	55	5	55	0	5	83.3333	83.3333	0	8.33333	0	91.6667	89.5833	2.08333	4.16667	0
		♂													18	29						1	48	48	0	47	1	19	100	95.8333	4.16667	0	-20.8333
		A Progeny of F2 Trans-het ♀: ♀w-,y-, 2x gRNA(GFP)/+; Cas9(RFP)/+ [RGywM] X ♂ w+/w+ (Canton S)
	batch #1 (10♀ x 10 ♂)	Phenotype	R	Ry	RywM	Rw	Ryw	RGywM	RGyw	RGwM	RGw	RGy	RG	GywM	Gyw	Gw	Gy	G	WT	yW	Yw	yw	total	w#	W#	G#	w(noG)#	#y	Cut@W	HDR%	R1@W	W%	cut@Y	wCUT%	wHDR%	w[R2]%	W%	yCut%
		♀		3			14		21		1	2			16					1	3	14	75	71	6	40	31	71	89.3333	6.66667	82.6667	8	89.3333	94.6667	10.0641	84.6026	4	67.7436
		♂				9	8		21						38						19	9	104	104	0	59	45	76	100	13.4615	86.5385	0	46.1538
	batch #2 (10♀ x 10 ♂)
		♀		3			9	1	13			1			15		2			4		9	57	50	10	32	18	57	75.4386	12.2807	63.1579	17.5439	100	79.6548	9.36616	70.2886	12.8042	100
		♂					9		17						16					5		15	62	57	5	33	24	62	83.871	6.45161	77.4194	8.06452	100
	batch #3 (10♀ x 10 ♂)
		♀		1	1		10		14			1		1	21	1	1			5		13	69	63	8	39	24	68	82.6087	13.0435	69.5652	11.5942	97.1014	91.3043	9.35193	81.9524	5.7971	98.5507
		♂					14		10						18							11	53	53	0	28	25	53	100	5.66038	94.3396	0	100
		A Progeny of F2 Trans-het ♀: ♀w-,y-, 2x gRNA(GFP)/+; Cas9(RFP)/+ [RGywM] X ♂ w+/w+ (Canton S)
	batch #1 (10♀ x 10 ♂)	Phenotype	R	Ry	RywM	Rw	Ryw	RGywM	RGyw	RGwM	RGw	RGy	RG	GywM	Gyw	Gw	Gy	G	WT	yW	Yw	yw	total	w#	W#	G#	w(noG)#	#y	Cut@W	HDR%	R1@W	W%	cut@Y	wCUT%	wHDR%	w[R2]%	W%	yCut%
		♀					5		5			4		1	16		4			1		16	52	51	9	30	21	52	96.1538	15.3846	80.7692	17.3077	100	98.0769	18.0371	80.0398	8.65385	98.2759
		♂					8		12						23						1	14	58	58	0	35	23	57	100	20.6897	79.3103	0	96.5517
	batch #2 (10♀ x 10 ♂)
		♀		1			18		14			2			14	1	1				1	8	60	59	4	32	27	58	96.6667	6.66667	90	6.66667	93.3333	98.3333	4.89583	93.4375	3.33333	95.1042
		♂					15		15						18						1	15	64	64	0	33	31	63	100	3.125	96.875	0	96.875
	batch #3 (10♀ x 10 ♂)
		♀	1		3		11		14			4		1	22		4			2	2	8	72	69	11	45	24	69	91.6667	25	66.6667	15.2778	91.6667	95.8333	15.8333	80	7.63889	89.1667
		♂					12		15						25						5	18	75	75	0	40	35	70	100	6.66667	93.3333	0	86.6667
		A Progeny of F2 Hetero ♀ with Maternal Cas9: ♀w-,y-, 2x gRNA(GFP)/+; +/+ [GywM] X ♂ w–/w–
	batch #1 (10♀ x 10 ♂)	Phenotype	R	Ry	RywM	Rw	Ryw	RGywM	RGyw	RGwM	RGw	RGy	RG	GywM	Gyw	Gw	Gy	G	WT	yW	Yw	yw	total	w#	W#	G#	w(noG)#	#y	Cut@W	HDR%	R1@W	W%	cut@Y	wCUT%	wHDR%	w[R2]%	W%	yCut%
		♀														38					3	30	71	71	0	38	33	30	100	7.04225	92.9577	0	-15.493	100	8.69354	91.3065	0	79.3103
		♂													45	3					6	33	87	87	0	48	39	78	100	10.3448	89.6552	0	79.3103
	batch #2 (10♀ x 10 ♂)
		♀														36					1	30	67	67	0	36	31	30	100	7.46269	100	0	-10.4478	100	16.4179	83.5821	0	88.0597
		♂													37	2					2	26	67	67	0	39	28	63	100	16.4179	83.5821	0	88.0597
	batch #3 (10♀ x 10 ♂)
		♀														37					1	32	70	70	0	37	33	32	100	5.71429	94.2857	0	-8.57143	98.6667	7.52381	91.1429	1.33333	84
		♂													41				1		5	28	75	74	1	41	33	69	97.3333	9.33333	88	1.33333	84

## Sheet: vas-Cas9
Glossary		A Progeny of F0 cross with Maternal Cas9
R = Cas 9: dsRed phenotype		♀w+/w+; vas-Cas9/+ X ♂w-,y-, 2x gRNA; +/+										Zygotic+Deposition		Deposition
G = gRNA: GFPphenotype	batch #1 (10♀ x 10 ♂)	Phenotype	R	RGywM	RGyw	RGw	GywM	Gyw	G	WT	total	cut@W	cut@Y	cut@W	cut@Y
w = white phenotype		♀		34	4		24				62	100	100	100	100
y = yellow phenotype		♂	29							43	72
M = mosaic for white phenotype	batch #2 (10♀ x 10 ♂)
♀ = female		♀		40	3		43	3			89	100	100	100	100
♂ = male		♂	54							45	99
collect and keep	batch #3 (10♀ x 10 ♂)
		♀		38	3		37	2			80	100	100	100	100
		♂	40							41	81
		B Progeny of F0 cross with Paternal Cas9
		♀w-,y-, 2x gRNA/+ (I) X ♂Cas9/+ (III)										Zygotic+Deposition		Deposition
	batch #1 (10♀ x 10 ♂)	Phenotype	R	RGywM	RGyw	RGw	Gyw	Gw	G	WT	total	cut@W	cut@Y	cut@W	cut@Y
		♀	31	35	1				27	40	134	100	100	0	0
		♂	26		29	4	25	14		42	140
	batch #2 (10♀ x 10 ♂)
		♀	31	21					26	38	116	100	100	0	0
		♂	38		29		13	6		29	115
	batch #3 (10♀ x 10 ♂)
		♀	28	30					24	37	119	100	100	0	0
		♂	30		27		20	13		33	123
		A Progeny of F1 Trans-het ♀ with Maternal Cas9: ♀w-,y-, 2x gRNA(GFP)/+; Cas9(RFP)/+ [RGywM] X ♂ w+/w+ (Canton S)
	batch #1 (10♀ x 10 ♂)	Phenotype	R	Ry	Rw	Ryw	RGywM	RGyw	RGwM	RGw	RGy	GywM	Gyw	Gw	Gy	G	WT	yW	ywM	Yw	yw	total	w#	W#	G#	w(noG)#	#y	Cut@W	HDR%	R1@W	W%	cut@Y	wCUT%	wHDR%	w[R2]%	W%	yCut%
		♀				1	3	58		1	6	1	70	1	7			1			5	154	153	14	147	6	152	98.7013	90.9091	7.79221	9.09091	97.4026	96.7191	85.8054	10.9136	5.86124	96.0697
		♂		3	1	3		53					49	1						1	3	114	111	3	103	8	111	94.7368	80.7018	14.0351	2.63158	94.7368
	batch #2 (10♀ x 10 ♂)
		♀		4		1		20			5		28		3					2	5	68	64	12	56	8	66	88.2353	64.7059	23.5294	17.6471	94.1176	90.9926	72.9779	18.0147	10.386	84.5588
		♂		2				16					35	7						1	3	64	62	2	58	4	56	93.75	81.25	12.5	3.125	75
	batch #3 (10♀ x 10 ♂)
		♀	1	2		2		26			3	2	47	2	6			1			2	94	90	13	86	4	91	91.4894	82.9787	8.51064	13.8298	93.617	90.1891	76.2116	13.9775	9.69267	92.6418
		♂		4		3		23		1			35	2							4	72	68	4	61	7	69	88.8889	69.4444	19.4444	5.55556	91.6667
		A Progeny of F1 Trans-het ♀ with Paternal Cas9: ♀w-,y-, 2x gRNA(GFP)/+; Cas9(RFP)/+ [RGywM] X ♂ w+/w+ (Canton S)
	batch #1 (10♀ x 10 ♂)	Phenotype	R	Ry		Ryw	RGywM	RGyw	RGwM	RGw	RGy	GywM	Gyw	Gw	Gy	G	WT	yW	ywM	Yw	yw	total	w#	W#	G#		#y	Cut@W	HDR%	R1@W	W%	cut@Y	wCUT%	wHDR%	w[R2]%	W%	yCut%
		♀		3		5		30			4		31		1	1					4	79	76	9	67	9	78	92.4051	69.6203	22.7848	11.3924	97.4684	96.2025	75.4351	20.7674	5.6962	98.7342
		♂				1		24					34								5	64	64	0	58	6	64	100	81.25	18.75	0	100
	batch #2 (10♀ x 10 ♂)
		♀		4				35			4		37	1	4						4	89	85	12	81	4	88	91.0112	82.0225	8.98876	13.4831	97.7528	88.6091	78.3676	10.2415	10.1898	98.8764
		♂		2				38					38					4			5	87	81	6	76	5	87	86.2069	74.7126	11.4943	6.89655	100
	batch #3 (10♀ x 10 ♂)
		♀		2	1	2	1	23	1	1	4		51	2	3						1	92	90	9	86	4	87	95.6522	86.9565	8.69565	9.78261	89.1304	97.8261	92.403	5.42309	4.8913	94.5652
		♂				1		37					55									93	93	0	92	1	93	100	97.8495	2.15054	0	100
		A Progeny of F1 Hetero ♀ with Maternal Cas9: ♀w-,y-, 2x gRNA(GFP)/+; +/+ [GywM] X ♂ w-/w-
	batch #1 (10♀ x 10 ♂)	Phenotype	R	Ry		Ryw	RGywM	RGyw	RGwM	RGw	RGy	GywM	Gyw	Gw	Gy	G	WT	yW	ywM	Yw	yw	total	w#	W#	G#	w(noG)#	#y	Cut@W	HDR%	R1@W	W%	cut@Y	wCUT%	wHDR%	w[R2]%	W%	yCut%
		♀												102			1			17		120	119	1	102	17	0	98.3333	70	28.3333	0.833333	0	99.1667	71.4198	27.7469	0.416667	0
		♂											26	44						11		81	81	0	70	11	26	100	72.8395	27.1605	0	-35.8025
	batch #2 (10♀ x 10 ♂)
		♀												58						9		67	67	0	58	9	0	100	73.1343	26.8657	0	0	98.3871	65.5994	32.7877	0.806452	0
		♂											15	34			1			11	1	62	61	1	49	12	16	96.7742	58.0645	38.7097	1.6129	-48.3871
	batch #3 (10♀ x 10 ♂)
		♀												79						9		88	88	0	79	9	0	100	79.5455	20.4545	0	0	97.619	80.2489	17.3701	1.19048	0
		♂											37	39			2			6		84	82	2	76	6	37	95.2381	80.9524	14.2857	2.38095	-11.9048
		A Progeny of F2 Trans-het ♀: ♀w-,y-, 2x gRNA(GFP)/+; Cas9(RFP)/+ [RGywM] X ♂ w+/w+ (Canton S)
	batch #1 (10♀ x 10 ♂)	Phenotype	R	Ry	Rw	Ryw	RGywM	RGyw	RGwM	RGw	RGy	GywM	Gyw	Gw	Gy	G	WT	yW	ywM	Yw	yw	total	w#	W#	G#		#y	Cut@W	HDR%	R1@W	W%	cut@Y	wCUT%	wHDR%	w[R2]%	W%	yCut%
		♀				5		10				1	8		3			3	1		7	38	35	6	22	13	38	84.2105	15.7895	68.4211	15.7895	100	92.1053	3.48297	88.6223	7.89474	100
		♂				20		12					19								17	68	68	0	31	37	68	100	-8.82353	108.824	0	100
	batch #2 (10♀ x 10 ♂)
		♀		6		8		18					15		3	2		2			17	71	63	13	38	25	69	77.4648	7.04225	70.4225	18.3099	94.3662	88.7324	1.52113	87.2113	9.15493	90.5164
		♂			2	18		18					18							3	16	75	75	0	36	39	70	100	-4	104	0	86.6667
	batch #3 (10♀ x 10 ♂)
		♀		4		14		8			1	1	11					1			12	52	47	6	21	26	52	80.7692	-19.2308	100	11.5385	100	90.3846	-6.04396	96.4286	5.76923	96.4286
		♂			1	11		17					13							1	13	56	56	0	30	26	54	100	7.14286	92.8571	0	92.8571
		A Progeny of F2 Trans-het ♀: ♀w-,y-, 2x gRNA(GFP)/+; Cas9(RFP)/+ [RGywM] X ♂ w+/w+ (Canton S)
	batch #1 (10♀ x 10 ♂)	Phenotype	R	Ry		Ryw	RGywM	RGyw	RGwM	RGw	RGy	GywM	Gyw	Gw	Gy	G	WT	yW	ywM	Yw	yw	total	w#	W#	G#	w(noG)#	#y	Cut@W	HDR%	R1@W	W%	cut@Y	wCUT%	wHDR%	w[R2]%	W%	yCut%
		♀		3		6	1	9				1	15		4			3			9	51	45	10	30	15	51	76.4706	17.6471	58.8235	19.6078	100	88.2353	20.1872	68.0481	9.80392	95.4545
		♂				11		11					16						1	2	3	44	44	0	27	17	42	100	22.7273	77.2727	0	90.9091
	batch #2 (10♀ x 10 ♂)
		♀				11		21			2		10					1			9	54	53	3	33	20	54	96.2963	22.2222	74.0741	5.55556	100	98.1481	24.4444	73.7037	2.77778	100
		♂				10		17					21								12	60	60	0	38	22	60	100	26.6667	73.3333	0	100
	batch #3 (10♀ x 10 ♂)
		♀		1		11		19			1		20		2			2			13	69	66	6	42	24	69	91.3043	21.7391	69.5652	8.69565	100	95.6522	14.9679	80.6842	4.34783	100
		♂				13		17					16								15	61	61	0	33	28	61	100	8.19672	91.8033	0	100
		A Progeny of F2 Hetero ♀ with Maternal Cas9: ♀w-,y-, 2x gRNA(GFP)/+; +/+ [GywM] X ♂ w–/w–
	batch #1 (10♀ x 10 ♂)	Phenotype	R	Ry		Ryw	RGywM	RGyw	RGwM	RGw	RGy	GywM	Gyw	Gw	Gy	G	WT	yW		Yw	yw	total	w#	W#	G#	w(noG)#	#y	Cut@W	HDR%	R1@W	W%	cut@Y	wCUT%	wHDR%	w[R2]%	W%	yCut%
		♀												29						1	29	59	59	0	29	30	29	100	0	100	0	-1.69492	100	5.17241	94.8276	0	82.7586
		♂											32							5	21	58	58	0	32	26	53	100	10.3448	89.6552	0	82.7586
	batch #2 (10♀ x 10 ♂)
		♀												27						1	24	52	52	0	27	25	24	100	3.84615	96.1538	0	-7.69231	100	5.97713	94.0229	0	91.8919
		♂											40							3	31	74	74	0	40	34	71	100	8.10811	91.8919	0	91.8919
	batch #3 (10♀ x 10 ♂)
		♀												32						2	26	60	60	0	32	28	26	100	6.66667	93.3333	0	-13.3333	100	7.7193	92.2807	0	100
		♂											31								26	57	57	0	31	26	57	100	8.77193	91.2281	0	100

## Sheet: Ubi-Cas9
Glossary		A Progeny of F0 cross with Maternal Cas9
R = Cas 9: dsRed phenotype		♀Cas9/+ (III) X ♂w-,y-, 2x gRNA (I)										Zygotic+Deposition		Deposition
G = gRNA: GFPphenotype	batch #1 (10♀ x 10 ♂)	Phenotype	R	RGywM	RGyw	RGw	GywM	Gyw	G	WT	total	cut@W	cut@Y	cut@W	cut@Y
w = white phenotype		♀		33	2		47	12			94	100	100	100	100
y = yellow phenotype		♂	37							39	76
M = mosaic for white phenotype	batch #2 (10♀ x 10 ♂)
♀ = female		♀		33	1		37	2			73	100	100	100	100
♂ = male		♂	33							42	75
collect and keep	batch #3 (10♀ x 10 ♂)
		♀		28			37	2			67	100	100	100	100
		♂	23							41	64
		B Progeny of F0 cross with Paternal Cas9
		♀w-,y-, 2x gRNA/+ (I) X ♂Cas9/+ (III)										Zygotic+Deposition		Deposition
	batch #1 (10♀ x 10 ♂)	Phenotype	R	RGywM	RGyw	RGw	Gyw	Gw	G	WT	total	cut@W	cut@Y	cut@W	cut@Y
		♀	23	25	2	1			12	30	93	100	92.8571	0	0
		♂	14		7	4	6	9		15	55
	batch #2 (10♀ x 10 ♂)
		♀	13	19		2			17	33	84	100	80.9524	0	0
		♂	21		15	3	11	12		19	81
	batch #3 (10♀ x 10 ♂)
		♀	26	28					18	30	102	100	100	0	0
		♂	30		28		12	17		31	118
		A Progeny of F1 Trans-het ♀ with Maternal Cas9: ♀w-,y-, 2x gRNA(GFP)/+; Cas9(RFP)/+ [RGywM] X ♂ w+/w+ (Canton S)
	batch #1 (10♀ x 10 ♂)	Phenotype	R	Ry	Rw	Ryw	RGywM	RGyw	RGwM	RGw	RGy	RG	GywM	Gyw	Gw	Gy	G	WT	yW	Yw	yw	total	w#	W#	G#	w(noG)#	#y	Cut@W	HDR%	R1@W	W%	cut@Y	wCUT%	wHDR%	w[R2]%	W%	yCut%
		♀		3		5		23		4	6		1	25	1	3	3		2		3	79	74	17	66	8	71	87.3418	67.0886	20.2532	21.519	79.7468	92.6183	70.9127	21.7055	11.2858	89.8734
		♂		1		2		44						39							9	95	94	1	83	11	95	97.8947	74.7368	23.1579	1.05263	100
	batch #2 (10♀ x 10 ♂)
		♀				4		38			2		1	28	2	4		1	1		1	82	80	8	75	5	79	95.122	82.9268	12.1951	9.7561	92.6829	96.2952	75.0077	21.2874	5.51096	96.3415
		♂				5		32						34					1		7	79	78	1	66	12	79	97.4684	67.0886	30.3797	1.26582	100
	batch #3 (10♀ x 10 ♂)
		♀		2		6	2	24			7			30	1	7			2		11	92	88	18	71	17	91	91.3043	54.3478	36.9565	19.5652	97.8261	95.6522	56.7657	38.8864	9.78261	97.8926
		♂				9		35						43						1	10	98	98	0	78	20	97	100	59.1837	40.8163	0	97.9592
		A Progeny of F1 Trans-het ♀ with Paternal Cas9: ♀w-,y-, 2x gRNA(GFP)/+; Cas9(RFP)/+ [RGywM] X ♂ w+/w+ (Canton S)
	batch #1 (10♀ x 10 ♂)	Phenotype	R	Ry		Ryw	RGywM	RGyw	RGwM	RGw	RGy	RG	GywM	Gyw	Gw	Gy	G	WT	yW	Yw	yw	total	w#	W#	G#	w(noG)#	#y	Cut@W	HDR%	R1@W	W%	cut@Y	wCUT%	wHDR%	w[R2]%	W%	yCut%
		♀					1	20			1			15		5	1				1	44	44	7	43	1	43	100	95.4545	4.54545	15.9091	95.4545	100	90.7505	9.24947	7.95455	97.7273
		♂				2		19						21							1	43	43	0	40	3	43	100	86.0465	13.9535	0	100
	batch #2 (10♀ x 10 ♂)
		♀		1		4		26			4		1	35		6					3	80	79	11	72	7	80	97.5	80	17.5	13.75	100	98.75	82.8571	15.8929	6.875	100
		♂				3		48						43							4	98	98	0	91	7	98	100	85.7143	14.2857	0	100
	batch #3 (10♀ x 10 ♂)
		♀		2			1	43			4			45	3	4			2		1	105	101	12	100	1	102	92.381	90.4762	1.90476	11.4286	94.2857	96.1905	91.6236	4.56684	5.71429	97.1429
		♂				2		33						47							1	83	83	0	80	3	83	100	92.7711	7.22892	0	100
		A Progeny of F1 Hetero ♀ with Maternal Cas9: ♀w-,y-, 2x gRNA(GFP)/+; +/+ [GywM] X ♂ w-/w-
	batch #1 (10♀ x 10 ♂)	Phenotype	R	Ry	Rw	Ryw	RGywM	RGyw	RGwM	RGw	RGy	RG	GywM	Gyw	Gw	Gy	G	WT	yW	Yw	yw	total	w#	W#	G#	w(noG)#	#y	Cut@W	HDR%	R1@W	W%	cut@Y	wCUT%	wHDR%	w[R2]%	W%	yCut%
		♀													87			1		16		104	103	1	87	16	0	98.0769	67.3077	30.7692	0.961538	0	97.7227	75.7591	21.9636	1.13866	34.2105
		♂												45	25				1		5	76	75	1	70	5	51	97.3684	84.2105	13.1579	1.31579	34.2105
	batch #2 (10♀ x 10 ♂)
		♀													79					14		93	93	0	79	14	0	100	69.8925	30.1075	0	0	98.7013	71.9592	26.7421	0.649351	14.2857
		♂												34	33				1		9	77	76	1	67	9	44	97.4026	74.026	23.3766	1.2987	14.2857
	batch #3 (10♀ x 10 ♂)
		♀													93					19		112	112	0	93	19	0	100	66.0714	33.9286	0	0	100	69.1468	30.8532	0	20.3704
		♂												54	39					4	11	108	108	0	93	15	65	100	72.2222	27.7778	0	20.3704
		A Progeny of F2 Trans-het ♀: ♀w-,y-, 2x gRNA(GFP)/+; Cas9(RFP)/+ [RGywM] X ♂ w+/w+ (Canton S)
	batch #1 (10♀ x 10 ♂)	Phenotype	R	Ry	Rw	Ryw	RGywM	RGyw	RGwM	RGw	RGy	RG	GywM	Gyw	Gw	Gy	G	WT	yW	Yw	yw	total	w#	W#	G#	w(noG)#	#y	Cut@W	HDR%	R1@W	W%	cut@Y	wCUT%	wHDR%	w[R2]%	W%	yCut%
		♀	1	3		7		15		1	3			17	1	4			1	1	22	76	71	12	41	30	72	86.8421	7.89474	78.9474	15.7895	89.4737	93.4211	14.364	79.057	7.89474	82.2368
		♂			2	15		21						29	8					2	19	96	96	0	58	38	84	100	20.8333	79.1667	0	75
	batch #2 (10♀ x 10 ♂)
		♀		3		18		26			2			27		4	1		10		31	122	109	20	60	49	121	78.6885	-1.63934	80.3279	16.3934	98.3607	85.8044	-3.91702	89.7215	9.96663	97.4104
		♂			2	24		19						34					4		30	113	109	4	53	56	111	92.9204	-6.19469	99.115	3.53982	96.4602
	batch #3 (10♀ x 10 ♂)
		♀		2	1	13		9			1			11	2				2		12	53	49	5	23	26	50	84.9057	-13.2075	98.1132	9.43396	88.6792	92.4528	2.77123	89.6816	4.71698	94.3396
		♂				16		10						28							10	64	64	0	38	26	64	100	18.75	81.25	0	100
		A Progeny of F2 Trans-het ♀: ♀w-,y-, 2x gRNA(GFP)/+; Cas9(RFP)/+ [RGywM] X ♂ w+/w+ (Canton S)
	batch #1 (10♀ x 10 ♂)	Phenotype	R	Ry		Ryw	RGywM	RGyw	RGwM	RGw	RGy	RG	GywM	Gyw	Gw	Gy	G	WT	yW	Yw	yw	total	w#	W#	G#	w(noG)#	#y	Cut@W	HDR%	R1@W	W%	cut@Y	wCUT%	wHDR%	w[R2]%	W%	yCut%
		♀		1		8		17			2			21		1			6	1	5	62	55	10	41	14	61	77.4194	32.2581	45.1613	16.129	96.7742	88.7097	20.5408	68.1689	8.06452	98.3871
		♂				16		12						25							15	68	68	0	37	31	68	100	8.82353	91.1765	0	100
	batch #2 (10♀ x 10 ♂)
		♀		1	2	8	1	10			3			13	3	5			6	2	7	61	54	15	35	19	54	77.0492	14.7541	62.2951	24.5902	77.0492	88.5246	-5.88826	94.4128	12.2951	66.0756
		♂			4	9		10						8						7	11	49	49	0	18	31	38	100	-26.5306	126.531	0	55.102
	batch #3 (10♀ x 10 ♂)
		♀				3		22			3		1	23		4			5		10	71	66	12	53	13	71	85.9155	49.2958	36.6197	16.9014	100	92.9577	6.64789	86.3099	8.4507	100
		♂				13		7						9							21	50	50	0	16	34	50	100	-36	136	0	100
		A Progeny of F2 Hetero ♀ with Maternal Cas9: ♀w-,y-, 2x gRNA(GFP)/+; +/+ [GywM] X ♂ w–/w–
	batch #1 (10♀ x 10 ♂)	Phenotype	R	Ry	Rw	Ryw	RGywM	RGyw	RGwM	RGw	RGy	RG	GywM	Gyw	Gw	Gy	G	WT	yW	Yw	yw	total	w#	W#	G#	w(noG)#	#y	Cut@W	HDR%	R1@W	W%	cut@Y	wCUT%	wHDR%	w[R2]%	W%	yCut%
		♀													28				1		26	55	54	1	28	26	27	96.3636	1.81818	94.5455	1.81818	-1.81818	96.4577	0.909091	95.5486	1.77116	100
		♂												27					1		30	58	57	1	27	30	58	96.5517	0	96.5517	1.72414	100
	batch #2 (10♀ x 10 ♂)
		♀													30				2		23	55	53	2	30	23	25	92.7273	9.09091	83.6364	3.63636	-9.09091	87.5917	4.54545	83.0463	6.20415	85.9649
		♂												27					5	8	17	57	52	5	27	25	49	82.4561	0	82.4561	8.77193	85.9649
	batch #3 (10♀ x 10 ♂)
		♀													32				2		30	64	62	2	32	30	32	93.75	0	93.75	3.125	0	96.875	0	96.875	1.5625	100
		♂												47							51	98	98	0	47	51	98	100	0	100	0	100

## Sheet: BicC-Cas9
Glossary		A Progeny of F0 cross with Maternal Cas9
R = Cas 9: dsRed phenotype		♀Cas9/+ (III) X ♂w-,y-, 2x gRNA (I)													Zygotic+Deposition		Deposition
G = gRNA: GFPphenotype	batch #1 (10♀ x 10 ♂)	Phenotype	R	RGywM	RGyw	RGwM	RGw	RG	GywM	Gyw	Gw	G	WT	total	cut@W	cut@Y	cut@W	cut@Y
w = white phenotype		♀		39	9				41	1				90	100	100	100	100
y = yellow phenotype		♂	59										50	109
M = mosaic for white phenotype	batch #2 (10♀ x 10 ♂)
♀ = female		♀		30	4				39	4				77	100	100	100	100
♂ = male		♂	40										41	81
collect and keep	batch #3 (10♀ x 10 ♂)
		♀		35	5				47	8				95	100	100	100	100
		♂	37										39	76
		B Progeny of F0 cross with Paternal Cas9
		♀w-,y-, 2x gRNA/+ (I) X ♂Cas9/+ (III)													Zygotic+Deposition		Deposition
	batch #1 (10♀ x 10 ♂)	Phenotype	R	RGywM	RGyw	RGwM	RGw	RG	GywM	Gyw	Gw	G	WT	total	cut@W	cut@Y	cut@W	cut@Y
		♀	9			11		6				11	24	61	64.7059	0	0	0
		♂	11		1		9			4	14		16	55
	batch #2 (10♀ x 10 ♂)
		♀	15			14		7				9	16	61	66.6667	0	0	0
		♂	21		5		13	2		8	21		21	91
	batch #3 (10♀ x 10 ♂)
		♀	23			8		5				13	12	61	61.5385	0	0	0
		♂	14		8		11			9	7		15	64
		A Progeny of F1 Trans-het ♀ with Maternal Cas9: ♀w-,y-, 2x gRNA(GFP)/+; Cas9(RFP)/+ [RGywM] X ♂ w+/w+ (Canton S)
	batch #1 (10♀ x 10 ♂)	Phenotype	R	Ry	Rw	Ryw	RGywM	RGyw	RGwM	RGw	RGy	RG	GywM	Gyw	Gw	Gy	G	WT	yW	Yw	yw	total	w#	W#	G#	w(noG)#	#y	Cut@W	HDR%	R1@W	W%	cut@Y	wCUT%	wHDR%	w[R2]%	W%	yCut%
		♀		5		1		13	1		3		1	35		1			2		14	76	69	11	54	15	75	81.5789	42.1053	39.4737	28.9474	97.3684	89.2743	46.8102	42.4641	15.9888	98.6842	89.2743
		♂		1		8		20						30							7	66	65	1	50	15	66	96.9697	51.5152	45.4545	3.0303	100
	batch #2 (10♀ x 10 ♂)
		♀		3	1	2		30	1		2			24		3	1		2		8	77	72	11	61	11	74	87.013	58.4416	28.5714	28.5714	92.2078	90.2278	57.9093	32.3185	19.2037	96.1039	90.2278
		♂				4		23						24		1			2		7	61	59	3	48	11	61	93.4426	57.377	36.0656	9.83607	100
	batch #3 (10♀ x 10 ♂)
		♀	1	1		6		24			3			22		1	4	3	1		9	75	69	14	54	15	67	84	44	40	37.3333	78.6667	90.8235	52	38.8235	19.8431	89.3333	90.8235
		♂				1		33						35					1		15	85	84	1	68	16	85	97.6471	60	37.6471	2.35294	100
		A Progeny of F1 Trans-het ♀ with Paternal Cas9: ♀w-,y-, 2x gRNA(GFP)/+; Cas9(RFP)/+ [RGywM] X ♂ w+/w+ (Canton S)
	batch #1 (10♀ x 10 ♂)	Phenotype	R	Ry	Rw	Ryw	RGywM	RGyw	RGwM	RGw	RGy	RG	GywM	Gyw	Gw	Gy	G	WT	yW	Yw	yw	total	w#	W#	G#	w(noG)#		Cut@W	HDR%	R1@W	W%	cut@Y	wCUT%	wHDR%	w[R2]%	W%	yCut%
		♀	1	4		8		23			1			25		9			2	3	8	84	77	17	58	19	80	83.3333	38.0952	45.2381	40.4762	90.4762	86.6667	40.2976	46.369	25.2381	86.4881	86.6667
		♂		1	2	5		27						27	3				3	2	10	80	76	4	57	19	73	90	42.5	47.5	10	82.5
	batch #2 (10♀ x 10 ♂)
		♀				5		13			2			30		4			2		6	62	60	8	49	11	62	93.5484	58.0645	35.4839	25.8065	100	92.2287	57.8201	34.4086	17.4487	95.4545	92.2287
		♂			1	4		25						27				1	2	1	5	66	63	3	52	11	63	90.9091	57.5758	33.3333	9.09091	90.9091
	batch #3 (10♀ x 10 ♂)
		♀			1	5		20		1	5			40		5		1	3	1	5	87	83	14	71	12	83	90.8046	63.2184	27.5862	32.1839	90.8046	93.9317	68.3739	25.5578	17.5625	95.4023	93.9317
		♂				2		29						30					1		6	68	67	1	59	8	68	97.0588	73.5294	23.5294	2.94118	100
		A Progeny of F1 Hetero ♀ with Maternal Cas9: ♀w-,y-, 2x gRNA(GFP)/+; +/+ [GywM] X ♂ w-/w-
	batch #1 (10♀ x 10 ♂)	Phenotype	R	Ry	Rw	Ryw	RGywM	RGyw	RGwM	RGw	RGy	RG	GywM	Gyw	Gw	Gy	G	WT	yW	Yw	yw	total	w#	W#	G#	w(noG)#		Cut@W	HDR%	R1@W	W%	cut@Y	wCUT%	wHDR%	w[R2]%	W%	yCut%
		♀													67			1		27		95	94	1	67	27	0	97.8947	41.0526	56.8421	-97.8947	0	98.9474	45.851	53.0964	-48.9474	81.8182
		♂												51	7						19	77	77	0	58	19	70	100	50.6494	49.3506	0	81.8182
	batch #2 (10♀ x 10 ♂)
		♀													84			1		23		108	107	1	84	23	0	98.1481	55.5556	42.5926	-98.1481	0	99.0741	62.0474	37.0266	-49.0741	86.5169
		♂												71	4					2	12	89	89	0	75	14	83	100	68.5393	31.4607	0	86.5169
	batch #3 (10♀ x 10 ♂)
		♀												1	108			4		20		133	129	4	109	20	1	93.985	63.9098	30.0752	-93.985	0	95.7877	69.9067	25.881	-45.7877	100
		♂				5								73					1		4	83	82	1	73	9	83	97.5904	75.9036	21.6867	2.40964	100
		A Progeny of F2 Trans-het ♀: ♀w-,y-, 2x gRNA(GFP)/+; Cas9(RFP)/+ [RGywM] X ♂ w+/w+ (Canton S)
	batch #1 (10♀ x 10 ♂)	Phenotype	R	Ry	Rw	Ryw	RGywM	RGyw	RGwM	RGw	RGy	RG	GywM	Gyw	Gw	Gy	G	WT	yW	Yw	yw	total	w#	W#	G#	w(noG)#		Cut@W	HDR%	R1@W	W%	cut@Y	wCUT%	wHDR%	w[R2]%	W%	yCut%
		♀		2		7		15			1			16		3			3		18	65	60	9	35	25	65	84.6154	7.69231	76.9231	27.6923	100	90.8791	9.56044	81.3187	15.2747	88.5714
		♂			5	16		18						21				1		2	7	70	69	1	39	30	62	97.1429	11.4286	85.7143	2.85714	77.1429
	batch #2 (10♀ x 10 ♂)
		♀		2		13		12			3		1	13	1	1			1		8	55	52	7	31	21	54	89.0909	12.7273	76.3636	25.4545	96.3636	94.5455	13.2867	81.2587	12.7273	98.1818
		♂				9		16						21							19	65	65	0	37	28	65	100	13.8462	86.1538	0	100
	batch #3 (10♀ x 10 ♂)
		♀		9		8		11						14		3			1		10	56	46	13	28	18	56	64.2857	0	64.2857	46.4286	100	70.4762	0	70.4762	34.881	100
		♂		2		14		14						16					5		9	60	53	7	30	23	60	76.6667	0	76.6667	23.3333	100
		A Progeny of F2 Trans-het ♀: ♀w-,y-, 2x gRNA(GFP)/+; Cas9(RFP)/+ [RGywM] X ♂ w+/w+ (Canton S)
	batch #1 (10♀ x 10 ♂)	Phenotype	R	Ry	Rw	Ryw	RGywM	RGyw	RGwM	RGw	RGy	RG	GywM	Gyw	Gw	Gy	G	WT	yW	Yw	yw	total	w#	W#	G#	w(noG)#		Cut@W	HDR%	R1@W	W%	cut@Y	wCUT%	wHDR%	w[R2]%	W%	yCut%
		♀		2	2	16		13		2	3			18	1	1			2	3	18	81	77	8	38	39	73	90.1235	-6.17284	96.2963	19.7531	80.2469	95.0617	6.33387	88.7279	9.87654	82.8771
		♂				12		14		1				22	4						16	69	69	0	41	28	64	100	18.8406	81.1594	0	85.5072
	batch #2 (10♀ x 10 ♂)
		♀		3	1	13		20	1		1			18	1	1			2	4	8	73	68	7	42	26	66	86.3014	15.0685	71.2329	19.1781	80.8219	93.1507	15.0055	78.1452	9.58904	72.0202
		♂			6	11		24						22	4					6	14	87	87	0	50	37	71	100	14.9425	85.0575	0	63.2184
	batch #3 (10♀ x 10 ♂)
		♀		7	2	10		24		1	1			18		2					11	76	69	10	46	23	73	81.5789	21.0526	60.5263	26.3158	92.1053	90.7895	1.15132	89.6382	13.1579	92.9276
		♂			1	24		13						26						2	30	96	96	0	39	57	93	100	-18.75	118.75	0	93.75
		A Progeny of F2 Hetero ♀ with Maternal Cas9: ♀w-,y-, 2x gRNA(GFP)/+; +/+ [GywM] X ♂ w–/w–
	batch #1 (10♀ x 10 ♂)	Phenotype	R	Ry	Rw	Ryw	RGywM	RGyw	RGwM	RGw	RGy	RG	GywM	Gyw	Gw	Gy	G	WT	yW	Yw	yw	total	w#	W#	G#	w(noG)#		Cut@W	HDR%	R1@W	W%	cut@Y	wCUT%	wHDR%	w[R2]%	W%	yCut%
		♀													34						29	63	63	0	34	29	29	100	7.93651	92.0635	0	-7.93651	100	3.96825	96.0317	0	92.8571
		♂												24	1					1	30	56	56	0	25	31	54	100	0	100	0	92.8571
	batch #2 (10♀ x 10 ♂)
		♀													34					2	30	66	66	0	34	32	30	100	3.0303	96.9697	0	-9.09091	100	4.96343	95.0366	0	96.5517
		♂												30	1						27	58	58	0	31	27	57	100	6.89655	93.1034	0	96.5517
	batch #3 (10♀ x 10 ♂)
		♀													38						35	73	73	0	38	35	35	100	4.10959	95.8904	0	-4.10959	100	6.79164	93.2084	0	95.7895
		♂												52						2	41	95	95	0	52	43	93	100	9.47368	90.5263	0	95.7895
